# Supplementary material for: The Relationship Between Political Participation and Life Satisfaction Depends on Preference for Non-Democratic Solutions
Source: Springer Nature journal article supplement (doi:10.1007/s11482-021-10013-z), 2021-10-26
Supplement: MOESM1 [file 11482_2021_10013_MOESM1_ESM.docx]

**Table S1**

*Standardized Multilevel Structural Equations Modeling Coefficients Predicting Life Satisfaction*

| Predictors | Life Satisfaction | |
| --- | --- | --- |
| *b*(*SD*) | *95% CI* |
| Political participation (non-conflictual) | | |
| Within Level (Individual) |  |  |
| Preference for non-democratic political systems | .05(0.01) | .04, .06 |
| Political participation (non-conflictual) | -.01(0.00) | -.02, .00 |
| Preference for non-democratic political systems × Political participation (non-conflictual) | -.05(0.00) | -.06, -.04 |
| Protest activities | | |
| Within Level (Individual) |  |  |
| Preference for non-democratic political systems | .04(0.01) | .03, .05 |
| Protest activities | -.04(0.01) | -.05, -.04 |
| Preference for non-democratic political systems × Protest activities | -.05(0.01) | -.06, -.04 |

*Note.* *SD* = standard deviation of the posterior distribution; CI = Bayesian credibility interval. Analyses were controlled for the effect of gender, age, education, immigrant status, income level, and social class.

**Table S2**

*Standardized Multilevel Structural Equations Modeling Coefficients Predicting Life Satisfaction*

| Predictors | Life Satisfaction | |
| --- | --- | --- |
| *b*(*SD*) | *95% CI* |
| Political participation (non-conflictual) | | |
| Within Level (Individual) |  |  |
| Preference for non-democratic political systems | .03(0.01) | .02, .05 |
| Political participation (non-conflictual) | -.03(0.01) | -.05, -.02 |
| Preference for non-democratic political systems × Political participation (non-conflictual) | -.03(0.01) | -.04, -.01 |
| Between Level (Country) |  |  |
| GDP per capita | -.12(0.15) | -.42, .16 |
| GINI index | .34(0.15) | -.01, .58 |
| BTI Democracy Status | .19(0.18) | -.19, .53 |
| Protest activities | | |
| Within Level (Individual) |  |  |
| Preference for non-democratic political systems | .03(0.01) | .02, .05 |
| Protest activities | -.06(0.01) | -.07, -.05 |
| Preference for non-democratic political systems × Protest activities | -.02(0.01) | -.04, -.01 |
| Between Level (Country) |  |  |
| GDP per capita | -.13(0.15) | -.42, .17 |
| GINI index | .34(0.16) | -.01, .60 |
| BTI Democracy Status | .21(0.18) | -.17, .54 |

*Note.* *SD* = standard deviation of the posterior distribution; CI = Bayesian credibility interval. Analyses were controlled for the effect of gender, age, education, immigrant status, income level, and social class.
